# Supplementary material
Source: HighWire-hosted journal article supplement (https://molpharm.aspetjournals.org/highwire/filestream/87403/field_highwire_adjunct_files/0/473_supp_fig_1.pdf)
Supplement: 473_supp_fig_1.pdf [file 473_supp_fig_1.pdf]

**Influence of the TARP  $\gamma 8$ -selective negative allosteric modulator JNJ-55511118 on AMPA receptor gating and channel conductance**

**Ian D. Coombs, Craig A. Sexton, Stuart G. Cull-Candy, Mark Farrant**

Molecular Pharmacology MOLPHARM-AR-2021-000473

**Fig S1.** JNJ-118 effects on kinetics and steady-state current of GluA2(Q)/ $\gamma 8$ .

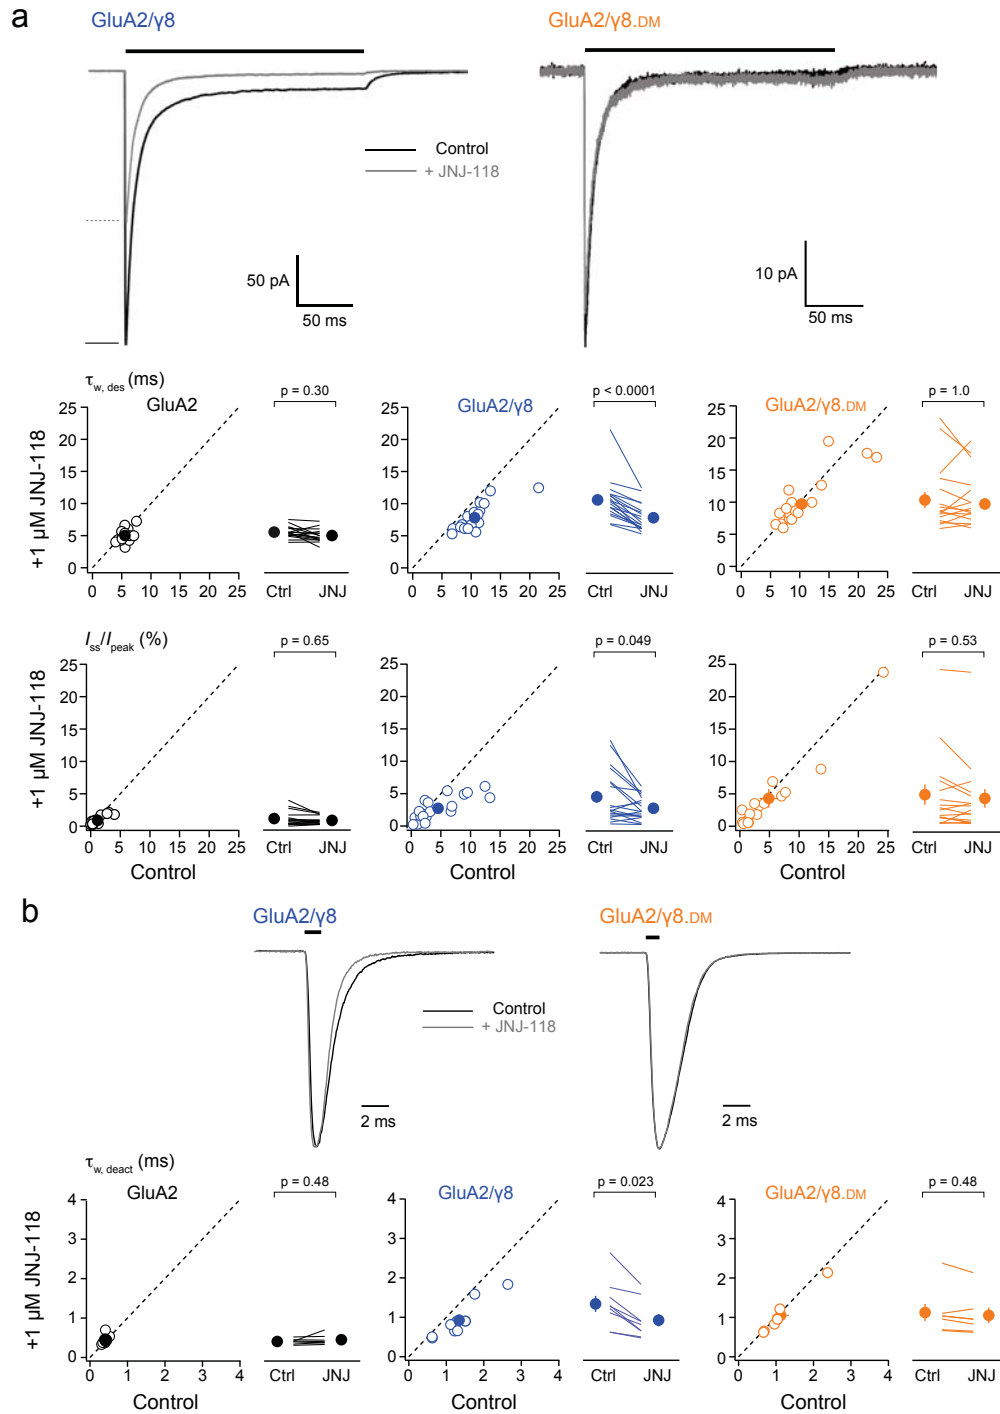

**Figure S1. JNJ-118 effects on kinetics and steady-state current of GluA2(Q)/ $\gamma$ 8**

**a**) Representative outside-out patch responses (10 mM glutamate, 200 ms) (black bars) recorded at  $-60$  mV from HEK293 cells transfected with GluA2/ $\gamma$ 8 (left) or GluA2/ $\gamma$ 8.DM (right) in control conditions (black) or in the presence of 1  $\mu$ M JNJ-118 (grey). Lower panels are scatter and paired plots (as in **Fig 2**) showing the effects of JNJ-118 on the weighted mean time constant of desensitization ( $\tau_{w, des}$ ) and fractional steady-state component ( $I_{ss}/I_{peak}$ ) for GluA2, GluA2/ $\gamma$ 8 and GluA2/ $\gamma$ 8.DM. Indicated p-values (adjusted for multiple comparisons as described in **Table 1**) are from two-sided Wilcoxon signed rank exact tests following a non-parametric omnibus test (**Table S1**). **b**) Representative outside-out patch responses (10 mM

glutamate, 1 ms) (black bars) recorded at -60 mV from HEK293 cells transfected with GluA2/ $\gamma$ 8 (left) or GluA2/ $\gamma$ 8.DM (right) in control conditions (black) or in the presence of 1  $\mu$ M JNJ-118 (grey). Lower panels are scatter and paired plots showing the effects of JNJ-118 on the weighted mean time constant of deactivation ( $\tau_{w, deact}$ ) for GluA2, GluA2/ $\gamma$ 8 and GluA2/ $\gamma$ 8.DM. Indicated p-values (adjusted as described in **Table 1**) are from two-sided Wilcoxon signed rank exact tests following a non-parametric omnibus test (**Table S1**).
